# Supplementary material for: A mitochondria-specific visible-light sensitized europium β-diketonate complex with red emission
Source: Royal Society of Chemistry journal article supplement (doi:10.1039/c3dt51117k), 2013-01-01
Supplement: c3dt51117k.pdf [file c3dt51117k.pdf]

## Supporting Information

### **Mitochondria-specific visible-light sensitized europium complex with red emission**

**V. Divya,<sup>†</sup> Vandana Sankar,<sup>‡</sup> K.G. Raghu<sup>‡</sup> and M. L. P. Reddy<sup>†\*</sup>**

<sup>†</sup>Chemical Sciences and Technology Division, National Institute for Interdisciplinary Science & Technology (NIIST), CSIR, Thiruvananthapuram-695 019, India

E-mail: [mlpreddy55@gmail.com](mailto:mlpreddy55@gmail.com)

<sup>‡</sup>Agroprocessing and Natural Products, National Institute for Interdisciplinary Science & Technology (NIIST), CSIR, Thiruvananthapuram-695019, India.

<sup>[b]</sup> *Agroprocessing and Natural Products, National Institute for Interdisciplinary Science & Technology (NIIST), CSIR, Thiruvananthapuram-695019, India*

*E mail:* [mlpreddy55@gmail.com](mailto:mlpreddy55@gmail.com)

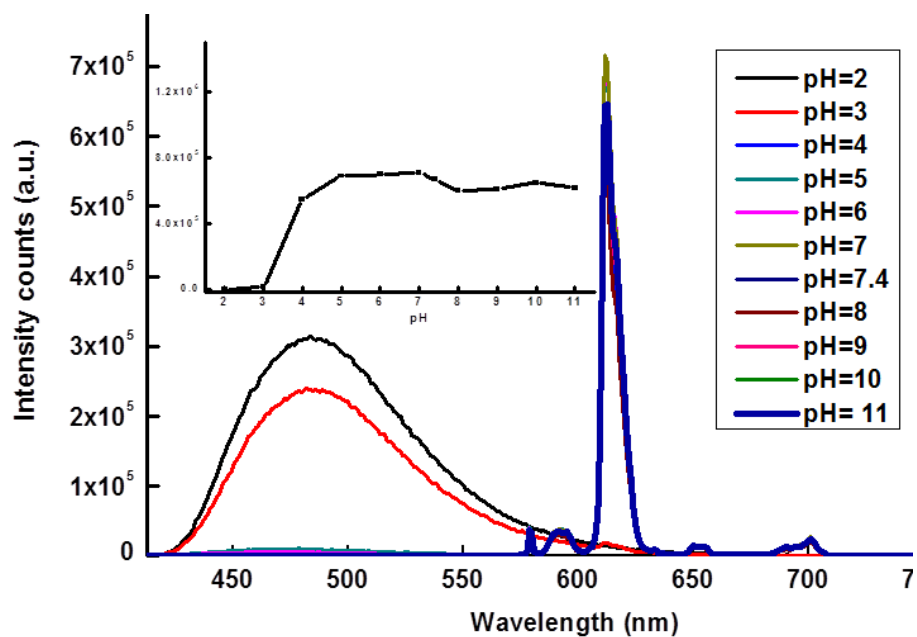

**Fig. S1** Effect of pH on the luminescence intensity of the complex  $\text{Eu}(\text{pfppd})_3(\text{tpy})$ , (inset profile shows the intensity at 612 nm versus pH).

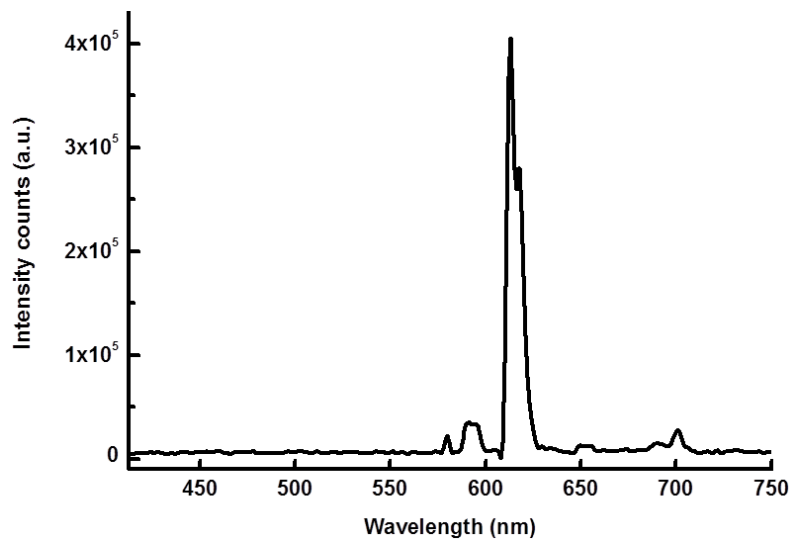

**Fig. S2** 77K emission spectra of complex Eu(pfppd)<sub>3</sub>(tpy) in DMSO/PBS = 2:98 ( $c = 1 \times 10^{-5}$  M, pH = 7.4,  $\lambda_{\text{ex}} = 403$  nm).

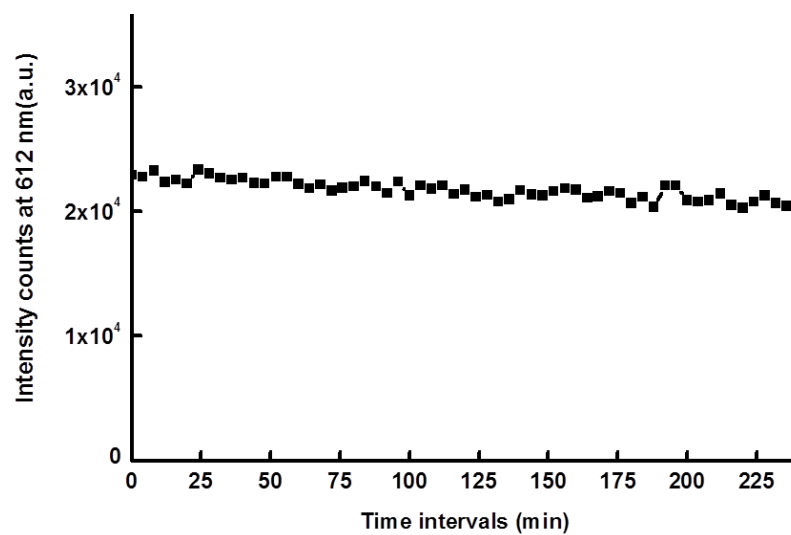

**Fig. S3** Photoluminescence intensity of complex  $\text{Eu}(\text{pfppd})_3(\text{tpy})$  in  $\text{DMSO}/\text{PBS} = 2:98$  as a function of irradiation time.
